# Supplementary material for: Selective host–guest chemistry, self-assembly and conformational preferences of m-xylene macrocycles probed by ion-mobility spectrometry mass spectrometry
Source: Royal Society of Chemistry journal article supplement (doi:10.1039/c9cp06938k), 2020-01-01
Supplement: c9cp06938k3.pdf [file c9cp06938k3.pdf]

*Supplementary Information for*

**Selective Host-Guest Chemistry: Self-Assembly and Conformational Preferences of m-Xylene Macrocycles Probed by Ion-Mobility Spectrometry Mass Spectrometry**

Benjamin A. Link,<sup>a</sup> Ammon J. Sindt,<sup>b</sup> Linda S. Shimizu,<sup>b</sup> and Thanh D. Do<sup>a,\*</sup>

<sup>a</sup> Department of Chemistry, University of Tennessee, Knoxville TN 37996

<sup>b</sup> Department of Chemistry and Biochemistry, University of South Carolina, Columbia, SC 29208 United States.

**TABLE OF CONTENTS**

|                                                                                              |    |
|----------------------------------------------------------------------------------------------|----|
| S1. Tables of $m/z$ , assignments, and CCSs                                                  |    |
| MXT .....                                                                                    | 2  |
| MXU .....                                                                                    | 3  |
| MXS .....                                                                                    | 4  |
| S2. Additional Figures                                                                       |    |
| Fig. S1. DG generated, QM optimized structures of MXT·Zn <sup>2+</sup> complexes .....       | 5  |
| Fig. S2. An example of isotope spacing used in assignments of $m/z$ peaks .....              | 6  |
| Fig. S3. Structures of 2MXU·DMSO and MXS·DMSO .....                                          | 7  |
| Fig. S4. Theoretical CCSs of neutral, deprotonated, and protonated MXT structures .....      | 8  |
| Fig. S5. Theoretical CCSs of selected MXS structures in neutral and deprotonated forms ..... | 9  |
| S3. IM-MS Method Parameters .....                                                            | 10 |

## S1. Tables of $m/z$ , assignments, and CCSs

\* indicates MS peaks with weak intensity.

--  $m/z$  difference greater than 50 ppm.

**Table S1. MXT**

| Observed $m/z$                           | Assignment                           | Theoretical $m/z$ | $m/z$ difference (ppm) | CCS ( $\text{\AA}^2$ ) |
|------------------------------------------|--------------------------------------|-------------------|------------------------|------------------------|
| <b><i>Negative Mode</i></b>              |                                      |                   |                        |                        |
| 355.1044                                 | [MXT-H] <sup>-</sup>                 | 355.1051          | -1.97                  | 114                    |
| 391.0810                                 | [MXT+Cl] <sup>-</sup>                | 391.0818          | -2.05                  | 118                    |
| 418.0996                                 | [MXT+NO <sub>3</sub> ] <sup>-</sup>  | 418.1008          | -2.87                  | 120                    |
| 711.2139                                 | [2MXT-H] <sup>-</sup>                | 711.2181          | -5.91                  | 171                    |
| 747.1905                                 | [2MXT+Cl] <sup>-</sup>               | 747.1947          | -5.60                  | 179                    |
| 774.2086                                 | [2MXT+NO <sub>3</sub> ] <sup>-</sup> | 774.2137          | -6.58                  | 181                    |
| <b><i>Positive Mode</i></b>              |                                      |                   |                        |                        |
| 357.1211                                 | [MXT+H] <sup>+</sup>                 | 357.1208          | 0.84                   | 109                    |
| 379.1019                                 | [MXT+Na] <sup>+</sup>                | 379.1027          | -2.11                  | 112                    |
| 395.0755                                 | [MXT+K] <sup>+</sup>                 | 395.0766          | -2.78                  | 113                    |
| 419.0416                                 | [MXT-H+Zn] <sup>+</sup>              | 419.0343          | 17.4                   | 108                    |
| 713.2325                                 | [2MXT+H] <sup>+</sup>                | 713.2337          | -1.68                  | 173                    |
| 735.2115                                 | [2MXT+Na] <sup>+</sup>               | 735.2156          | -5.57                  | 174                    |
| 775.1543                                 | [2MXT-H+Zn] <sup>+</sup>             | 775.1472          | 9.15                   | 175                    |
| <b><i>With added Zn<sup>2+</sup></i></b> |                                      |                   |                        |                        |
| 419.0408                                 | [MXT-H+Zn] <sup>+</sup>              | 419.0343          | 15.51                  | 108                    |
| 775.1532                                 | [2MXT-H+Zn] <sup>+</sup>             | 775.1472          | 7.74                   | 175                    |
| 1069.35                                  | [3MXT+H] <sup>+</sup>                | 1069.3470         | 5.14                   | 299                    |

**Table S2. MXU**

| Observed $m/z$       | Assignment                           | Theoretical $m/z$ | $m/z$ difference (ppm) | CCS ( $\text{\AA}^2$ ) |
|----------------------|--------------------------------------|-------------------|------------------------|------------------------|
| <b>Negative Mode</b> |                                      |                   |                        |                        |
| 323.1487             | [MXU-H] <sup>-</sup>                 | 323.1508          | -6.4                   | 113                    |
| 359.1246             | [MXU+Cl] <sup>-</sup>                | 359.1275          | -8.07                  | 115                    |
| 401.1578             | [MXU-H+DMSO] <sup>-</sup>            | 401.1647          | -17.2                  | 120                    |
| 437.1338             | [MXU+DMSO+Cl] <sup>-</sup>           | 437.1414          | -17.3                  | 121                    |
| 521.2025*            | [3MXU+2Cl] <sup>2-</sup>             | 521.2070          | -8.6                   | 308                    |
| 599.2123*            | [3MXU+2DMSO+2Cl] <sup>2-</sup>       | 599.2205          | -13.6                  | 316                    |
| 647.3055             | [2MXU-H] <sup>-</sup>                | 647.3094          | -6.02                  | 164                    |
| 683.2823             | [2MXU+Cl] <sup>-</sup>               | 683.2861          | -5.56                  | 171                    |
| 710.3006             | [2MXU+NO <sub>3</sub> ] <sup>-</sup> | 710.3051          | -6.33                  | 173                    |
| <b>Positive Mode</b> |                                      |                   |                        |                        |
| 325.1654             | [MXU+H] <sup>+</sup>                 | 325.1665          | -3.38                  | 106                    |
| 347.1490             | [MXU+Na] <sup>+</sup>                | 347.1484          | 1.70                   | 107                    |
| 363.1229             | [MXU+K] <sup>+</sup>                 | 363.1223          | 1.65                   | 107                    |
| 425.1720*            | [MXU+DMSO+Na] <sup>+</sup>           | 425.1623          | 22.8                   | 128                    |
| 441.1305             | [MXU+DMSO+K] <sup>+</sup>            | 441.1363          | -13.14                 | 133                    |
| 506.2243             | [3MXU+H+K] <sup>2+</sup>             | 506.2235          | 1.58                   | 224                    |
| 649.3335             | [2MXU+H] <sup>+</sup>                | 649.3251          | 12.9                   | 169                    |
| 660.3135*            | [4MXU+H+Na] <sup>2+</sup>            | 660.3160          | -3.70                  | 265                    |
| 668.3071             | [4MXU+H+K] <sup>2+</sup>             | 668.3030          | 6.10                   | 270                    |
| 671.3160             | [2MXU+Na] <sup>+</sup>               | 671.3070          | 13.4                   | 170                    |
| 687.2745             | [2MXU+K] <sup>+</sup>                | 687.2810          | -9.40                  | 170                    |
| 710.3175             | [4MXU+DMSO+2Na] <sup>2+</sup>        | 710.3140          | 4.90                   | 278                    |
| 718.3056             | [4MXU+DMSO+Na+K] <sup>2+</sup>       | 718.3010          | 6.40                   | 283                    |
| 749.25*              | [2MXU+DMSO+Na] <sup>+</sup>          | 749.3210          | --                     | 177                    |
| 830.3893             | [5MXU+H+K] <sup>2+</sup>             | 830.3825          | 8.18                   | 316                    |
| 880.3872             | [5MXU+DMSO+Na+K] <sup>2+</sup>       | 880.3805          | 7.38                   | 323                    |
| 992.4721             | [6MXU+H+K] <sup>2+</sup>             | 992.4615          | 10.68                  | 369                    |
| 995.4772             | [3MXU+Na] <sup>2+</sup>              | 995.4656          | 11.65                  | 220                    |
| 1011.446             | [3MXU+K] <sup>+</sup>                | 1011.440          | 5.93                   | 218                    |
| 1042.4464            | [6MXU+DMSO+Na+K] <sup>2+</sup>       | 1042.459          | -12.08                 | 368                    |
| 1095.450*            | [3MXU-H+DMSO+2Na] <sup>+</sup>       | 1095.462          | -10.9                  | 230                    |
| 1111.419             | [3MXU-H+DMSO+Na+K] <sup>+</sup>      | 1111.435          | -14.0                  | 225                    |

**Table S3. MXS**

| Observed $m/z$                                         | Assignment                             | Theoretical $m/z$ | $m/z$ difference (ppm) | CCS ( $\text{\AA}^2$ ) |
|--------------------------------------------------------|----------------------------------------|-------------------|------------------------|------------------------|
| <b>Negative Mode</b>                                   |                                        |                   |                        |                        |
| 427.1411                                               | [MXS-H] <sup>-</sup>                   | 427.1406          | 1.17                   | 119   133              |
| 463.1164                                               | [MXS-Cl] <sup>-</sup>                  | 463.1173          | -1.94                  | 129                    |
| 490.1354                                               | [MXS+NO <sub>3</sub> ] <sup>-</sup>    | 490.1363          | -1.84                  | 129                    |
| 541.1323                                               | [MXS+DMSO+Cl] <sup>-</sup>             | 541.1312          | 2.03                   | 138                    |
| 855.2865                                               | [2MXS-H] <sup>-</sup>                  | 855.2891          | -3.03                  | 196                    |
| <b>Positive Mode</b>                                   |                                        |                   |                        |                        |
| 429.1558                                               | [MXS+H] <sup>+</sup>                   | 429.1563          | -1.16                  | 119                    |
| 448.1292*                                              | [2MXS+H+K] <sup>2+</sup>               | 448.1342          | -11.16                 | 210                    |
| 451.1377                                               | [MXS+Na] <sup>+</sup>                  | 451.1382          | -1.11                  | 123                    |
| 467.1115                                               | [MXS+K] <sup>+</sup>                   | 467.1122          | -1.49                  | 125                    |
| 545.1163*                                              | [MXS+DMSO+K] <sup>+</sup>              | 545.1261          | -17.9                  | 149                    |
| 662.2036                                               | [3MXS+H+K] <sup>2+</sup>               | 662.2085          | -7.40                  | 262                    |
| 876.2775                                               | [4MXS+H+K] <sup>2+</sup>               | 876.2825          | -5.71                  | 318                    |
| 879.2854                                               | [2MXS+Na] <sup>+</sup>                 | 879.2867          | -1.48                  | 192                    |
|                                                        | [4MXS+2Na] <sup>2+</sup>               |                   |                        | 318                    |
| 895.2594                                               | [2MXS+K] <sup>+</sup>                  | 895.2606          | -1.34                  | 196                    |
|                                                        | [4MXS+2K] <sup>+</sup>                 |                   |                        | 312                    |
| 1090.3507                                              | [5MXS+H+K] <sup>2+</sup>               | 1090.357          | -5.78                  | 357                    |
| 1307.4333                                              | [3MXS+Na] <sup>+</sup>                 | 1307.435          | -1.30                  | 252                    |
|                                                        | [6MXS+2Na] <sup>2+</sup>               |                   |                        | 412                    |
| 1323.4035                                              | [3MXS+K] <sup>+</sup>                  | 1323.409          | -4.15                  | 249                    |
| <b>With (NH<sub>4</sub>)<sub>2</sub>SO<sub>4</sub></b> |                                        |                   |                        |                        |
| 525.1210                                               | [MXS+H+SO <sub>4</sub> ] <sup>-</sup>  | 525.1080          | 24.7                   | 136                    |
| 953.2524                                               | [2MXS+H+SO <sub>4</sub> ] <sup>-</sup> | 953.2565          | -4.30                  | 206                    |

## Additional Figures

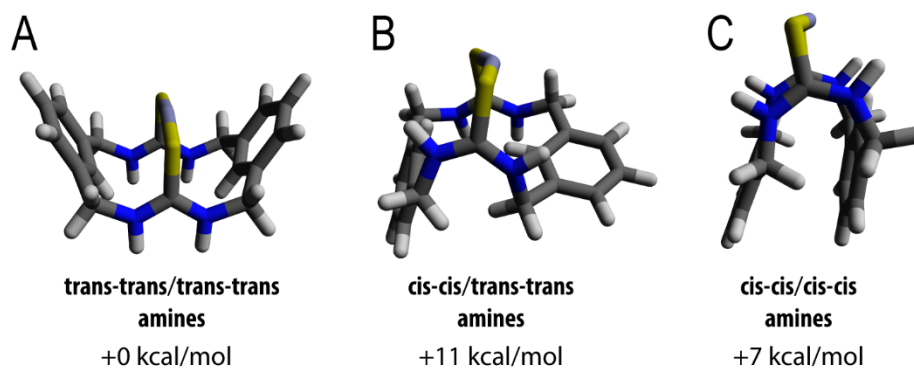

**Fig. S1.** DG generated, B3LYP optimized structures of  $\text{MXT}\cdot\text{Zn}^{2+}$  complexes. Note that to maximize the interactions between Zn and S atoms, the two thioureas should be in the *syn* configuration. The amines could be in any configuration, but the low energy structures have them in either *trans-trans* (lowest), *cis-cis* or a mixture of *trans-trans* and *cis-cis*.

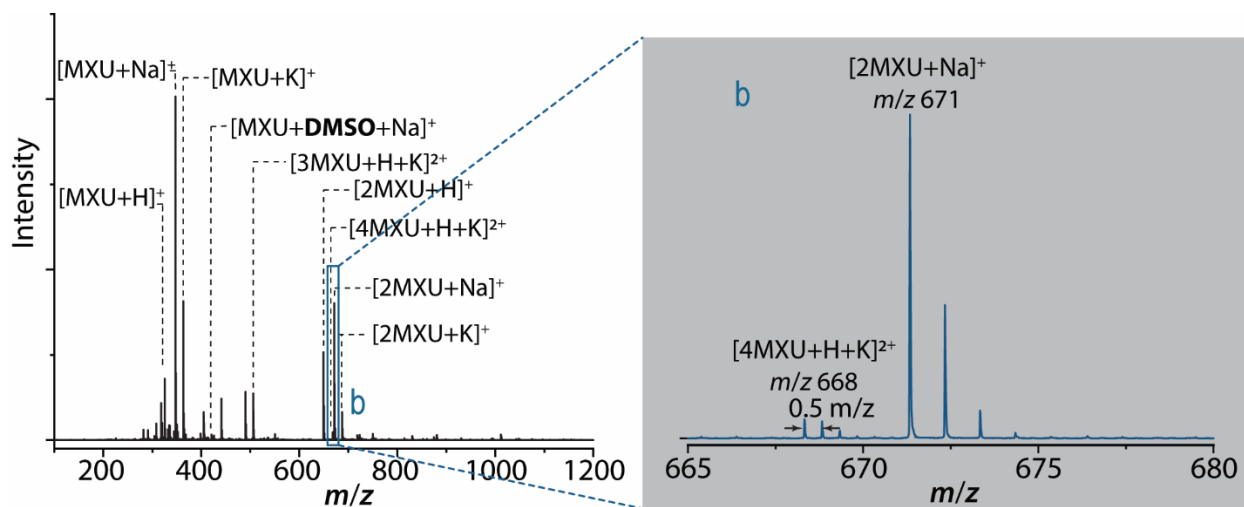

**Fig. S2.** An example of isotope spacing used in assignments of  $m/z$  mass spectral peaks.

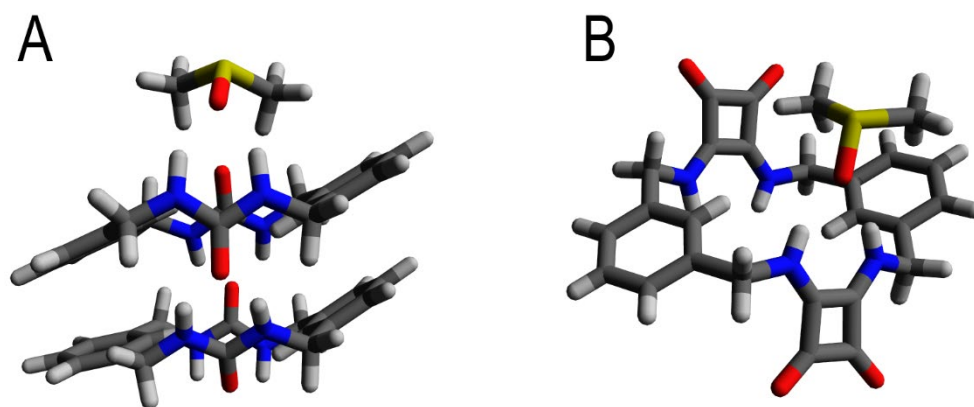

**Fig. S3.** (A) QM structure of 2MXU·DMSO. (B) X-ray crystal structure of MXS·DMSO.

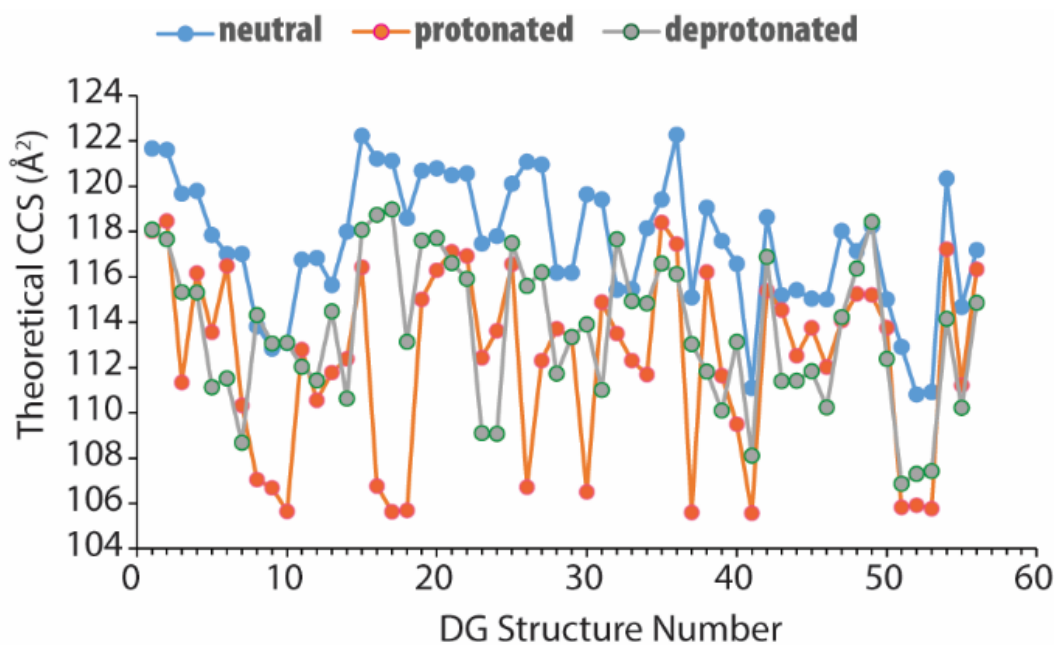

**Fig. S4.** Theoretical CCSs of 56 distinct MXT structures sampled by DG. We created the deprotonated  $[M-H]^-$  and  $[M+H]^+$  form of each structure and performed geometry optimization using the same protocol described in Section S1.

The general trend suggests that protonation tends to compact the structures more than deprotonation. The result appears to be consistent with our experimental data reported in section S2, in which the experimental CCSs in positive mode are often smaller than those in negative mode.



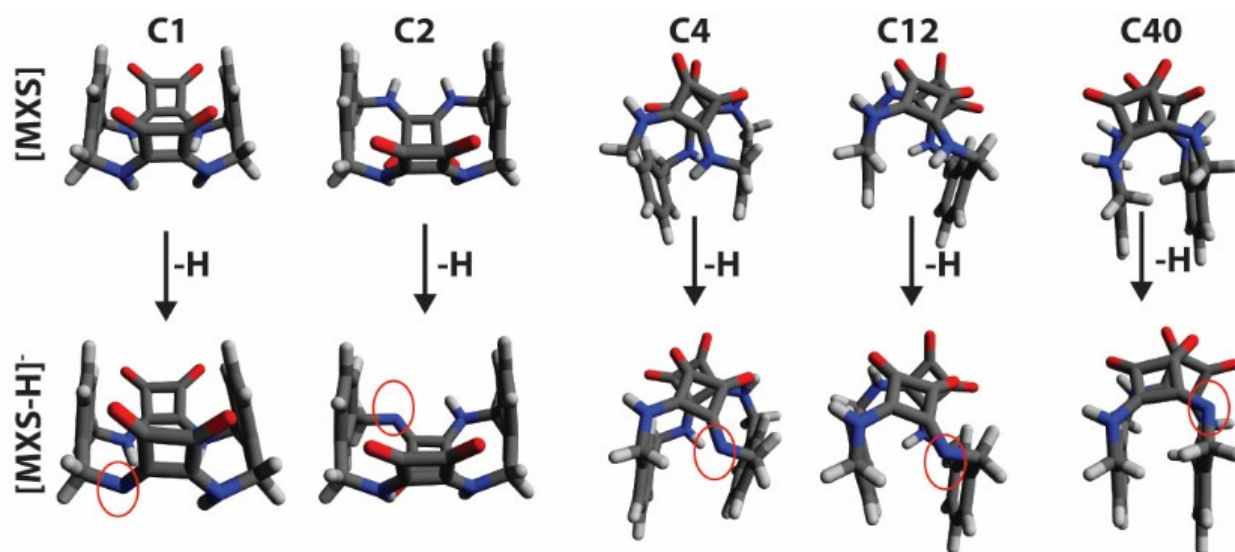

**Fig. S5.** Neutral and deprotonated structures of MXS obtained from DG and QM calculations. Because the four amine protons are not equivalent, we generated different versions of the deprotonated structures and reported those with the smallest CCSs.

**Table S4.** Tuning parameters (positive polarity) used in this work.

| Parameter                                   | Value        |
|---------------------------------------------|--------------|
| Pre-IMS Zone                                |              |
| Source: gas temperature                     | 300 °C       |
| Source: drying gas                          | 5 l/min      |
| Source: nebulizer pressure                  | 13 psi       |
| Source: capillary                           | 3500 V       |
| Optics I: fragmentor                        | 250 V        |
| IM front funnel: high pressure funnel delta | 110 V        |
| IM front funnel: high pressure RF           | 180 V        |
| IM front funnel: trap funnel delta          | 160 V        |
| IM front funnel: trap funnel RF             | 180 V        |
| IM front funnel: trap funnel exit           | 10 V         |
| IM trap: trap entrance grid low             | 82 V         |
| IM trap: trap entrance grid delta           | 2 V          |
| IM trap: trap entrance                      | 79 V         |
| IM trap: trap exit                          | 76 V         |
| IM trap: trap exit grid 1 low               | 72 V         |
| IM trap: trap exit grid 1 delta             | 6 V          |
| IM trap: trap exit grid 2 low               | 71 V         |
| IM trap: trap exit grid 2 delta             | 13 V         |
| Acquisition: trap fill time                 | 1000 $\mu$ s |
| Acquisition: trap release time              | 100 $\mu$ s  |
| Post-IMS Zone                               |              |
| IM drift tube: drift tube exit              | 210 V        |
| IM rear funnel: rear funnel entrance        | 200 V        |
| IM rear funnel: rear funnel RF              | 130 V        |
| IM rear funnel: rear funnel exit            | 35 V         |
| IM rear funnel: IM Hex entrance             | 42 V         |
| IM rear funnel: IM Hex delta                | 8 V          |
| Optics 1: Oct entrance lens                 | 32 V         |
| Optics 1: Lens 1                            | 28.3 V       |
| Optics 1: Lens 2                            | 15.8 V       |
| Quad: Quad DC                               | 26.6 V       |
| Quad: postfilter DC                         | 26.5 V       |
| Cell: gas flow                              | 22 psi       |
| Cell: cell entrance                         | 25.6 V       |
| Cell: Hex DC                                | 24.2 V       |
| Cell: Hex delta                             | -9 V         |
| Cell: Hex2 DC                               | 15 V         |
| Cell: Hex2 DV                               | -3 V         |
| Optics 2: Hex3 DC                           | 11.8 V       |
| Extractor: ion focus                        | 5.6 V        |

**Table S5.** Tuning parameters (negative polarity) used in this work.

| Parameter                                   | Value        |
|---------------------------------------------|--------------|
| Pre-IMS Zone                                |              |
| Source: gas temperature                     | 300 °C       |
| Source: drying gas                          | 5 l/min      |
| Source: nebulizer pressure                  | 9 psi        |
| Source: capillary                           | 3500 V       |
| Optics I: fragmentor                        | 300 V        |
| IM front funnel: high pressure funnel delta | -150 V       |
| IM front funnel: high pressure RF           | 200 V        |
| IM front funnel: trap funnel delta          | -180 V       |
| IM front funnel: trap funnel RF             | 200 V        |
| IM front funnel: trap funnel exit           | -10 V        |
| IM trap: trap entrance grid low             | -97 V        |
| IM trap: trap entrance grid delta           | -10 V        |
| IM trap: trap entrance                      | -91 V        |
| IM trap: trap exit                          | -90 V        |
| IM trap: trap exit grid 1 low               | -87.7 V      |
| IM trap: trap exit grid 1 delta             | -5 V         |
| IM trap: trap exit grid 2 low               | -87 V        |
| IM trap: trap exit grid 2 delta             | 10.5 V       |
| Acquisition: trap fill time                 | 1000 $\mu$ s |
| Acquisition: trap release time              | 150 $\mu$ s  |
| Post-IMS Zone                               |              |
| IM drift tube: drift tube exit              | -250 V       |
| IM rear funnel: rear funnel entrance        | -240 V       |
| IM rear funnel: rear funnel RF              | 180 V        |
| IM rear funnel: rear funnel exit            | -43 V        |
| IM rear funnel: IM Hex entrance             | -41 V        |
| IM rear funnel: IM Hex delta                | 8 V          |
